# Supplementary material for: Polymeric heptazine imide by O doping and constructing van der Waals heterostructures for photocatalytic water splitting: a theoretical perspective from transition dipole moment analyses
Source: Royal Society of Chemistry journal article supplement (doi:10.1039/c9cp06092h), 2020-01-01
Supplement: c9cp06092h1.pdf [file c9cp06092h1.pdf]

Electronic Supplementary Information

***Polymeric heptazine imide by doping O and  
constructing van der Waals heterostructures  
for photocatalytic water splitting: a theoretical  
perspective from transition dipole moment  
analyses***

Xirui Zhang,<sup>a</sup> Chao Yu,<sup>a</sup> Jintong Guan,<sup>a</sup> Shicheng Jiang,<sup>a</sup> Yunhui Wang,<sup>b</sup> Kaiming Deng,<sup>a</sup>

Zhaoshun Meng<sup>\*b</sup> and Ruifeng Lu<sup>\*ac</sup>

<sup>a</sup>*Department of Applied Physics, Nanjing University of Science and Technology, Nanjing*

*210094, P. R. China. E-mail: rflu@njust.edu.cn*

<sup>b</sup>*Information Physics Research Center, School of Science, Nanjing University of Posts and*

*Telecommunications, Nanjing 210023, P. R. China. E-mail: zsmeng@njupt.edu.cn*

<sup>c</sup>*State Key Laboratory of Molecular Reaction Dynamics, Dalian Institute of Chemical Physics,*

*Chinese Academy of Sciences, Dalian 116023, P. R. China.*

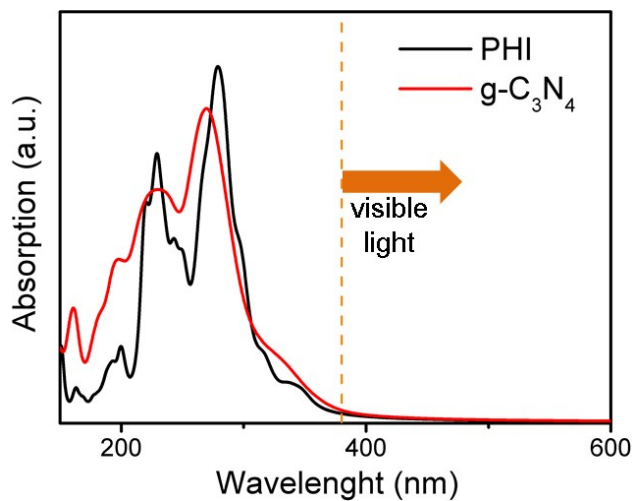

**Fig. S1** Light absorption of PHI and g-C<sub>3</sub>N<sub>4</sub>. They both lack visible light absorption.

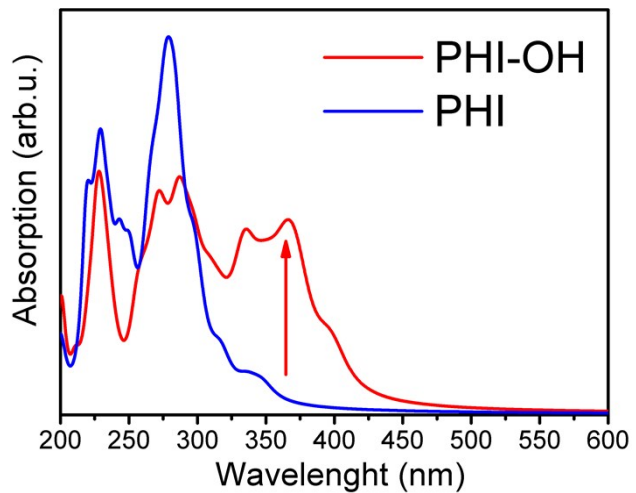

**Fig. S2** Light absorption of PHI and PHI-OH. PHI-OH has an absorption peak around 370 nm.

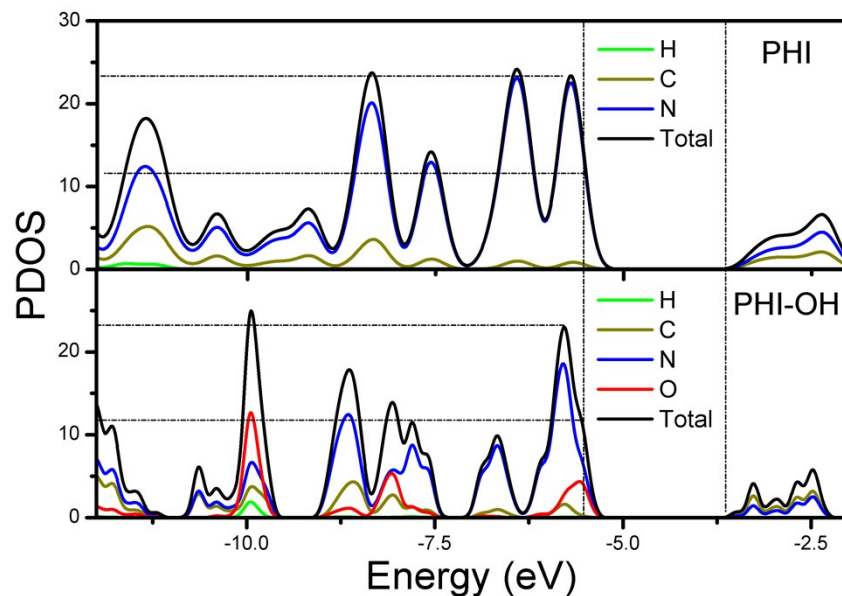

**Fig. S3** PDOS of PHI and PHI-OH. O atoms has a contribution around  $-5\sim-6$  eV in PHI-OH DOS, yet the total DOS doesn't increase near Fermi energy.

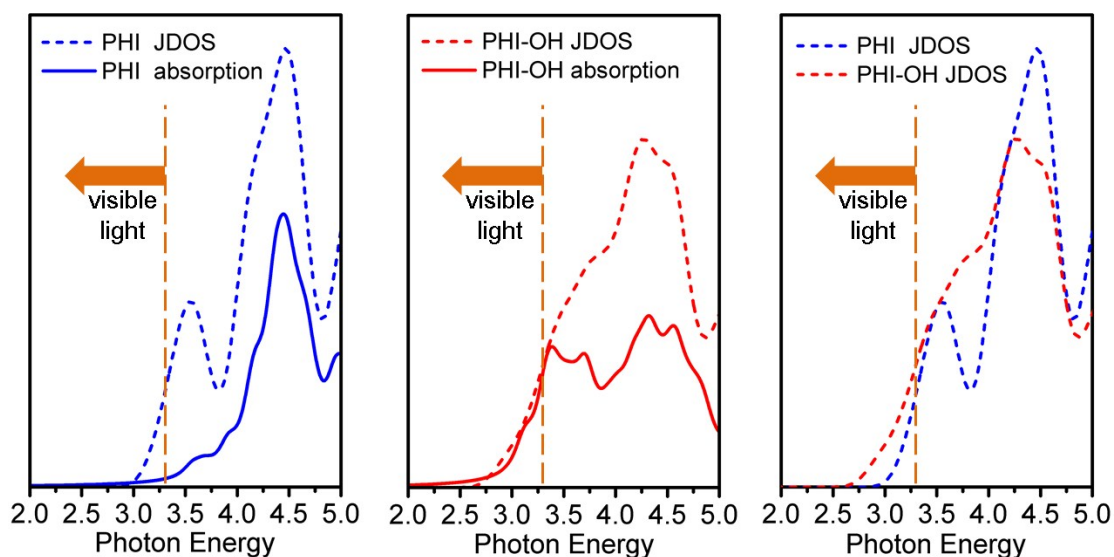

**Fig. S4** JDOS of PHI and PHI-OH comparing with their light absorptions. JDOS of PHI and PHI-OH has similar value around  $3\sim3.5$  photon energy. However, because of significant difference in TDM, PHI and PHI-OH has very different light absorption this energy range.

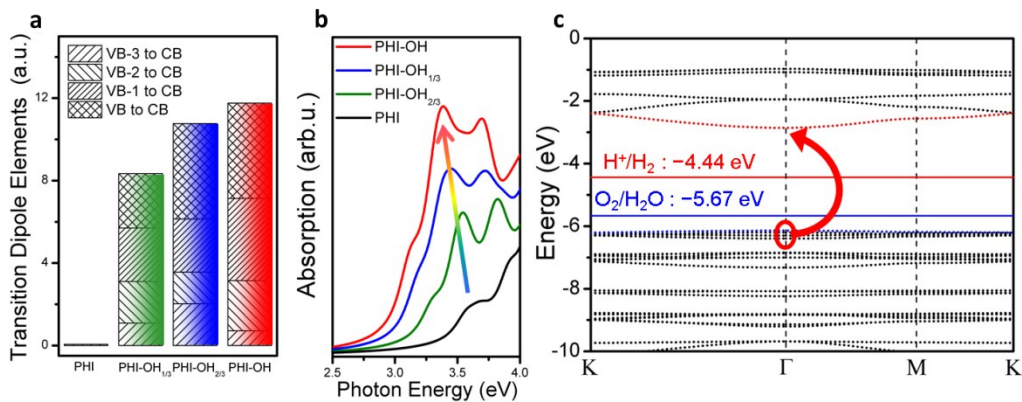

**Fig. S5** TDM of  $\Gamma$  point of PHI, PHI-OH<sub>1/3</sub>, PHI-OH<sub>2/3</sub> and PHI-OH and their light absorption. Visible light absorptions are improved while TDMs becoming bigger.

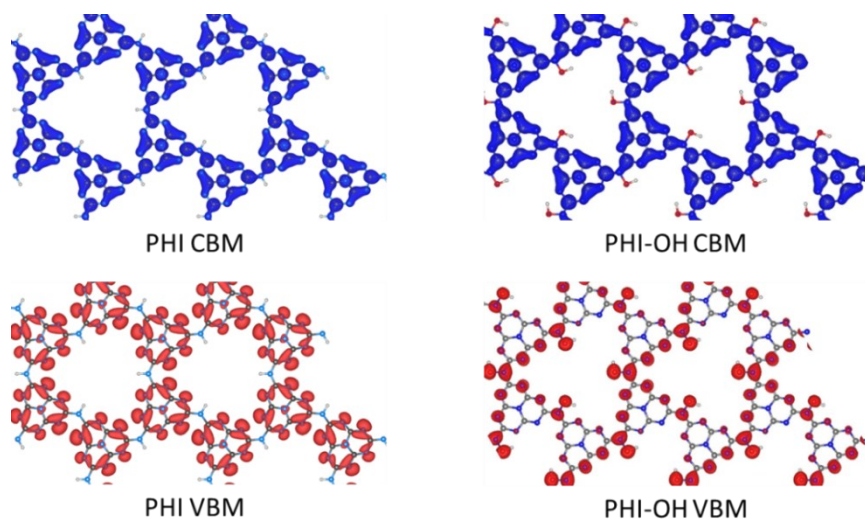

**Fig. S6** The charge densities of the CBM (red) and VBM (blue) for PHI and PHI-OH.

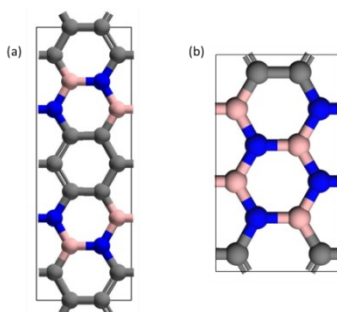

**Fig. S7** Structures of BC<sub>3</sub>N and BCN. Pink, blue and dark grey spheres represent B, N and C atoms, respectively.
